# Supplementary material
Source: PubMed Central journal article supplement (PMC3381515)
Supplement: NIHMS263180-supplement-01.pdf [file NIHMS263180-supplement-01.pdf]

a. Supplementary Figures and Legends

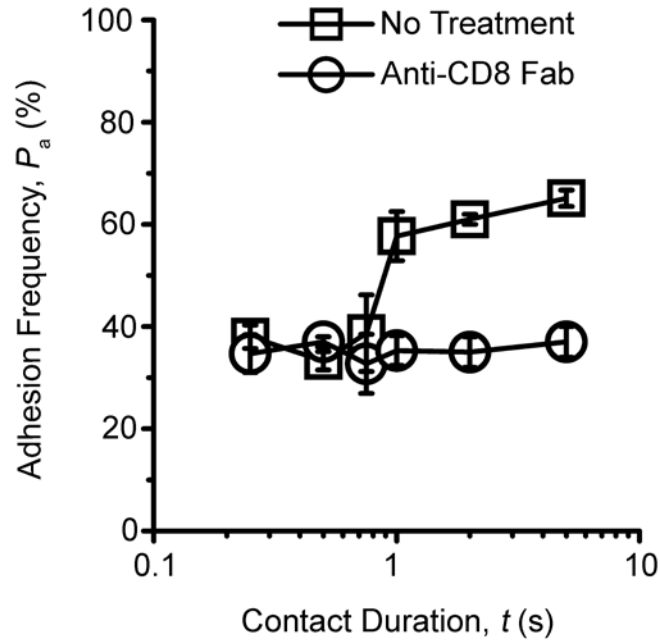

**Figure S1, related to Figure 2. Anti-CD8 Fab blocked the second-stage adhesion increment.**

Adhesion frequency  $P_a$  vs. contact duration  $t$  data (points) of OT1 T cells interacting with RBCs bearing 4 OVA:H-2K<sup>b</sup>/μm<sup>2</sup> in the absence (□) or presence (○) of anti-CD8 Fab. Each T cell-RBC pair was tested repeatedly for 50 contact-retract cycles at a given contact duration to estimate an adhesion frequency, and 2-6 cell pairs were tested for each  $t$  to calculate a mean  $P_a \pm$  s.e.m.

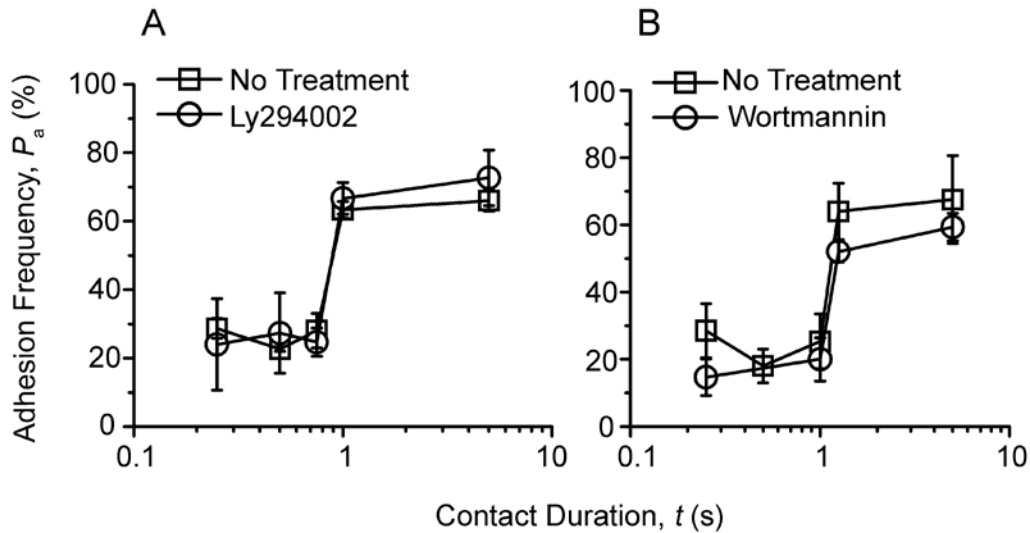

**Figure S2, related to Figure 3. TCR-induced CD8-dependent increased adhesion is not affected by PI3K inhibition.** Adhesion frequency  $P_a$  vs. contact duration  $t$  data of F5 T cells interacting with RBCs bearing 32 NP68:H-2D<sup>b</sup>/μm<sup>-2</sup> in the absence (□) and presence (○) of Ly294002 (a) and Wortmannin (b). Each T cell-RBC pair was tested repeatedly for 50 contact-retract cycles at a given contact duration to estimate an adhesion frequency, and 3-5 cell pairs were tested for each  $t$  to calculate a mean  $P_a \pm$  s.e.m.

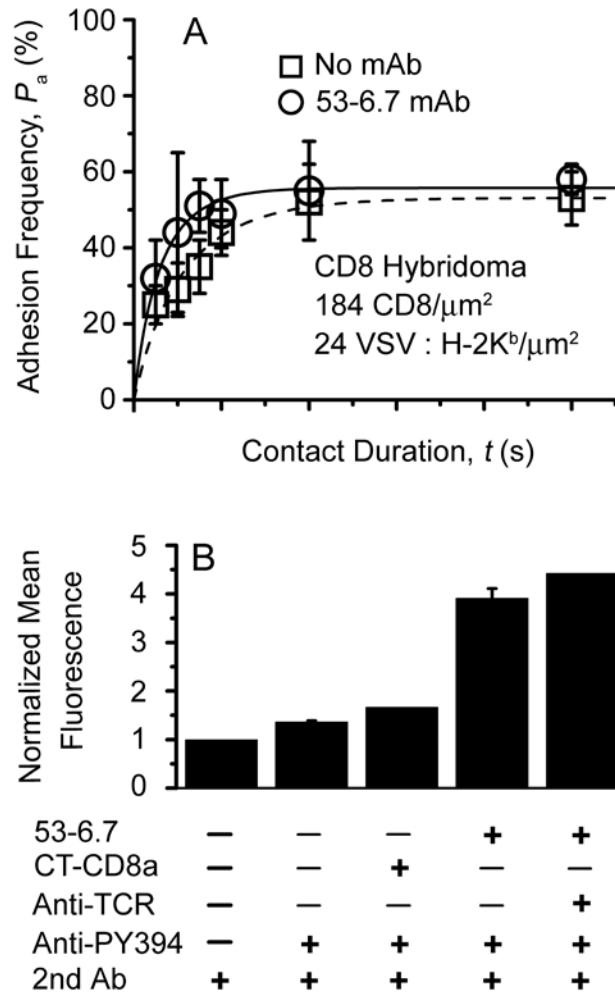

**Figure S3, related to Figure 4. Effect of 53-6.7 mAb on pMHC-CD8 binding kinetics and phosphorylation of Lck Y394. A,  $P_a$  vs.  $t$  data of CD8<sup>+</sup>-TCR<sup>-</sup> OT1 hybridoma interacting with RBCs coated with VSV:H-2K<sup>b</sup> pMHC in the absence (□) or presence of 53-6.7 mAb (○). Data (points) were presented as mean  $\pm$  s.e.m. of 2-3 pairs of cells each making 50 contacts to estimate an adhesion frequency. Curves represent model-fit to data (Chesla et al., 1998). B, OTI T cells were incubated with 53-6.7 or CT-CD8a Fab in the absence or presence of anti-TCR mAb. Cells were then incubated with anti-PY394 mAb followed by staining with PE-conjugated second antibody and analyzed by flow cytometry. Data are presented as mean  $\pm$  s.e.m. of 1-2 experiments.**

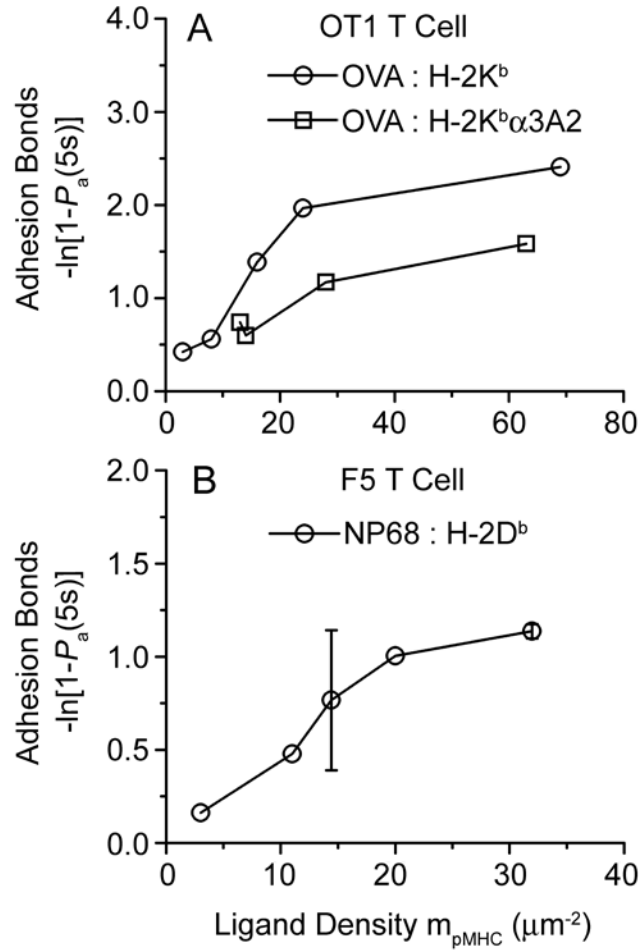

**Figure S4, related to Figure 5. The adhesion bonds as a function of ligand density.** Adhesion bonds calculated from adhesion frequency  $P_a$  measured at 5 s contact time are converted to adhesion bonds  $\langle n \rangle$  by inverting Eq. 1 and plotted vs. ligand density for all OT1 (A) and F5 (B) T cells tested in this work. Each point is the average value of 3-5 pairs of cells from the same batch except for the two with error bars, which are averages of 13-23 cells from 2-3 batches T cells. Error bars in this figure indicate variations in cells from different batches. Error bars indicating variations in cells from the same batch are shown in other figures of this paper.

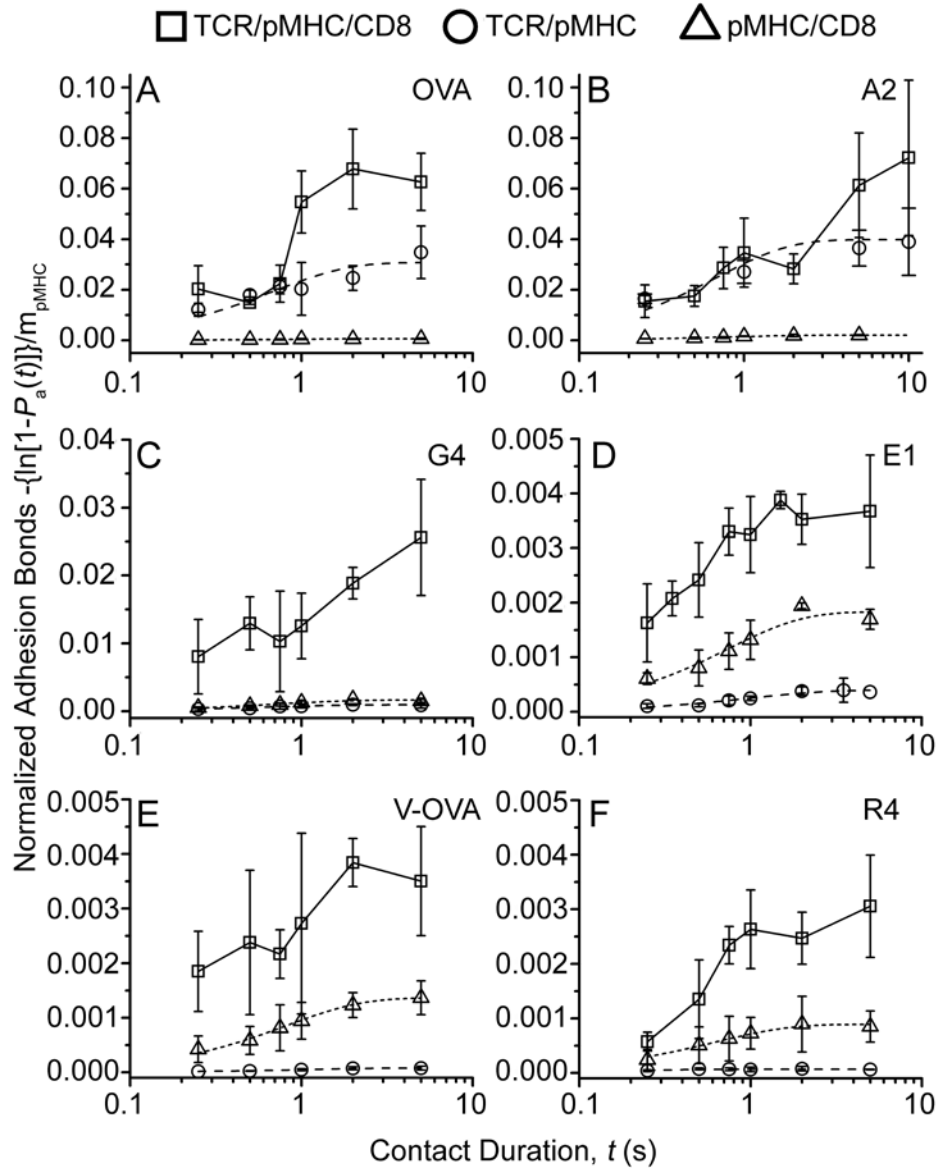

**Figure S5, related to Figure 7. Synergy between TCR and CD8 amplifies T cell discrimination.** Normalized adhesion bonds vs. contact duration data for OT1 T cells interacting with RBCs bearing H-2K<sup>b</sup> ( $\square$ ) or H-2K<sup>b</sup> $\alpha$ 3A2 ( $\circ$ ) complexed with OVA (A), A2 (B), G4 (C), E1 (D), V-OVA (E), and R4 (F). Also presented are data measured using RBCs bearing H-2K<sup>b</sup> in the presence of the anti-TCR blocking mAb B20.1 ( $\triangle$ ). Dashed curves represent trendlines to the sum of TCR/pMHC ( $\circ$ ) and pMHC/CD8 ( $\triangle$ ) data. These are the same data as Fig. 7A-F but the y-axis scale is shown as linear instead of logarithmic. Note that unlike Fig. 7A-F, different y-axis

scales are used here for different panels to show different  $\langle n \rangle / m_{\text{pMHC}}$  ranges for different peptides. The pMHC densities  $m_{\text{pMHC}}$  used for each peptide were listed in Table S1.

### b. Supplemental Table and Legend

Table S1, related to Figure 7 and Figure S5. The pMHC densities used for binding measurements of TCR-CD8-pMHC, TCR-pMHC and CD8-pMHC interactions.

| pMHC Density ( $\mu\text{m}^{-2}$ ) | OVA | A2  | G4   | E1   | V-OVA | R4   |
|-------------------------------------|-----|-----|------|------|-------|------|
| TCR-CD8-pMHC                        | 22  | 20  | 117  | 246  | 158   | 184  |
| TCR-pMHC                            | 86  | 47  | 1354 | 1229 | 1471  | 1908 |
| CD8-pMHC                            | 844 | 529 | 579  | 541  | 1529  | 761  |

### c. Supplementary Movie Legends

**Movie S1, related to Figure 1. Micropipette adhesion frequency assay.** Real-time movie illustrating the micropipette adhesion frequency assay. An OTI T cell (left) was being driven by micromanipulation to test in repeated contact-retract cycles against a red blood cell (RBC, right). The RBC serves as an surrogate antigen-presenting cell by coating OVA:H-2K<sup>b</sup> onto its surface (right). It also acts as an adhesion sensor by stretching its membrane in response to the bond force when the T cell retracts, enabling visualization of adhesion. Two contact-retract cycles are shown. The first cycle results in no adhesion and the second cycle results in adhesion.

**Movie S2, related to Figure 6. Alternating experiment.** The left panel shows a three-time fast-motion movie of an alternating experiment. A F5 T cell (left) was repeatedly contacting a RBC (right) bearing NP68:H-2D<sup>b</sup> with durations alternating between 0.25 and 5 s. The upper right panel shows the outcomes of the sequential contacts as adhesion scores (circles, right ordinate; 1 = adhesion, 0 = no adhesion) and their running frequency (triangles, left ordinate). The lower right panel shows the running frequencies for the two contact durations as a bar graph. The data plots are synchronized with the movie.

#### **d. Supplemental Reference**

Chesla, S.E., Selvaraj, P., and Zhu, C. (1998). Measuring two-dimensional receptor-ligand binding kinetics by micropipette. *Biophys J* 75, 1553-1572.
